# Supplementary material for: Identification of Appropriate Endogenous Biomarker for Risk Assessment of Multidrug and Toxin Extrusion Protein‐Mediated Drug‐Drug Interactions in Healthy Volunteers
Source: PubMed Central journal article supplement — Clin Pharmacol Ther. 2020 Oct 9;109(2):507–16. doi: 10.1002/cpt.2022 (PMC7891601; doi:10.1002/cpt.2022), 2020-10-09
Supplement: CPT-109-507-s001.pdf [file CPT-109-507-s001.pdf]

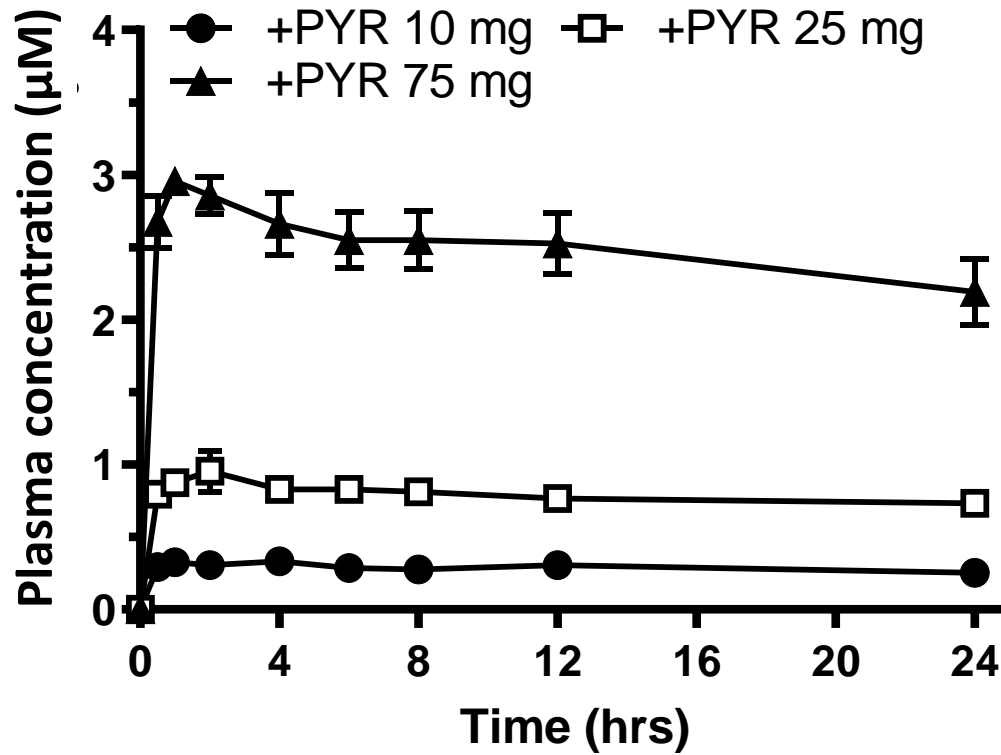

**Figure S1 Plasma concentration-time profiles of pyrimethamine**

Plasma concentrations of pyrimethamine were shown. The symbols represent the mean  $\pm$  SEM (n=12).
