# Supplementary material for: Identification of Appropriate Endogenous Biomarker for Risk Assessment of Multidrug and Toxin Extrusion Protein‐Mediated Drug‐Drug Interactions in Healthy Volunteers
Source: PubMed Central journal article supplement — Clin Pharmacol Ther. 2020 Oct 9;109(2):507–16. doi: 10.1002/cpt.2022 (PMC7891601; doi:10.1002/cpt.2022), 2020-10-09
Supplement: CPT-109-507-s002.pdf [file CPT-109-507-s002.pdf]

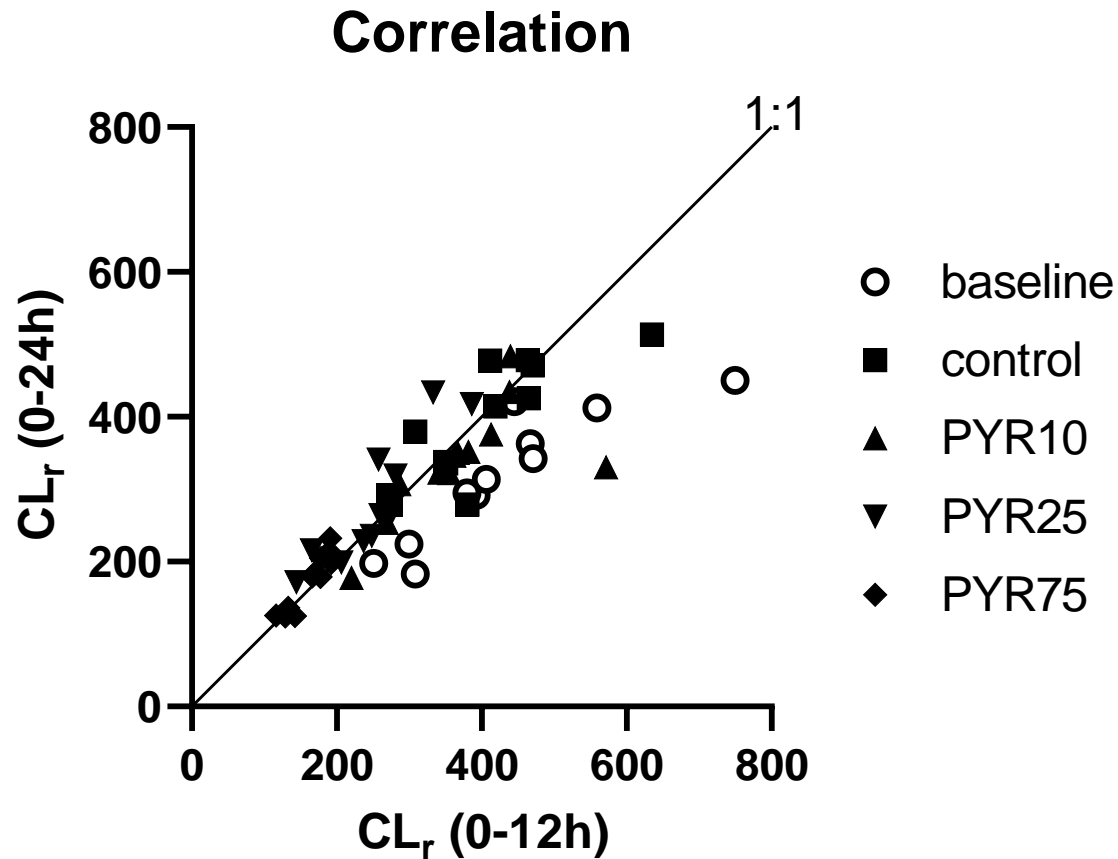

**Figure S2 Comparison of  $CL_r$  of 1-NMN with duration of 0-12h [ $CL_r$  (0-12h)], and 0-24h [ $CL_r$  (0-24h)].**

AUC was calculated using linear trapezoidal rule.
