# Supplementary material for: Identification of Appropriate Endogenous Biomarker for Risk Assessment of Multidrug and Toxin Extrusion Protein‐Mediated Drug‐Drug Interactions in Healthy Volunteers
Source: PubMed Central journal article supplement — Clin Pharmacol Ther. 2020 Oct 9;109(2):507–16. doi: 10.1002/cpt.2022 (PMC7891601; doi:10.1002/cpt.2022), 2020-10-09
Supplement: CPT-109-507-s003.pdf [file CPT-109-507-s003.pdf]

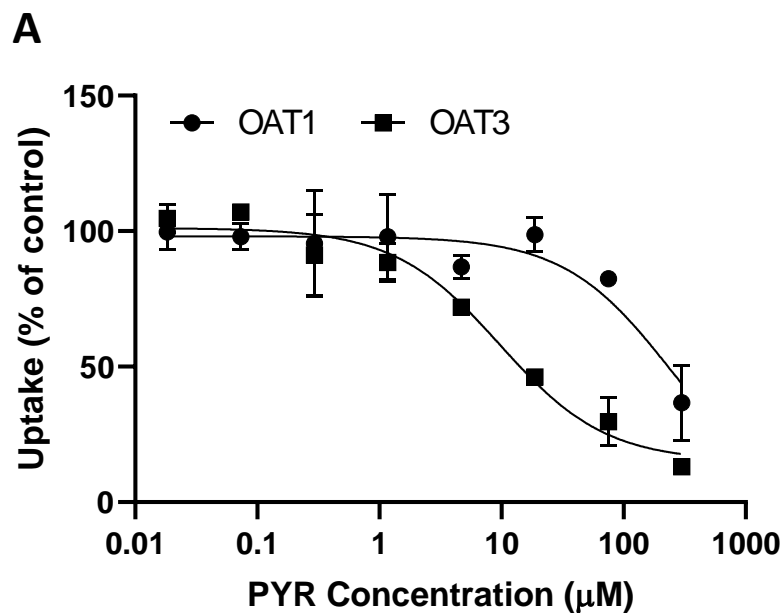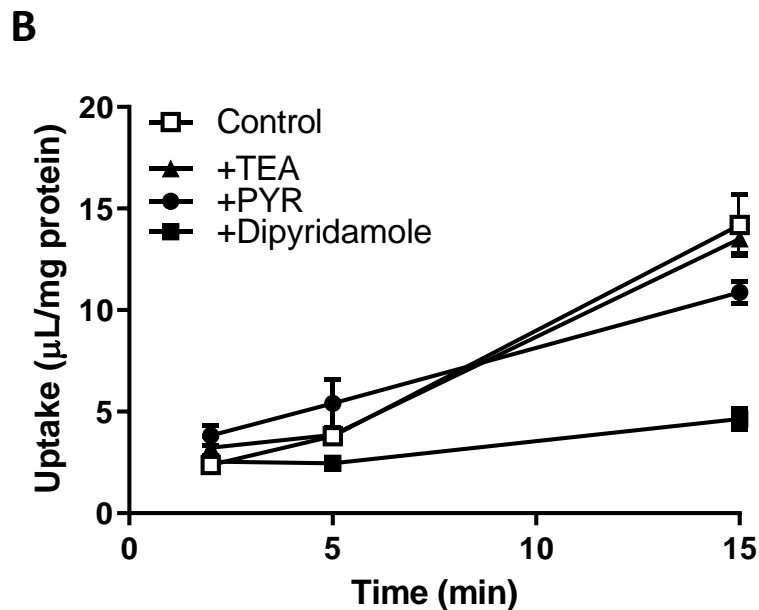

**Figure S3 Effect of pyrimethamine on OAT1 and OAT3 (A), and ENT1 (B)**

A Uptake of PAH and ES was determined in the presence of pyrimethamine at various concentration in the stable expression system of OAT1 and OAT3 using HEK293 cells. Each symbol represents the mean and SEM (n=3). Rigid lines represent the fitted line. Non-linear regression analysis was conducted as described in Supplemental Methods to determine  $IC_{50}$  of  $241 \pm 55 \mu\text{M}$ , and  $9.69 \pm 2.27 \mu\text{M}$  for OAT1 and OAT3, respectively.

B Uptake of  $m^1A$  (100  $\mu\text{M}$ ) was determined in HEK293 cells in the presence and absence of inhibitors; TEA 5mM, pyrimethamine 10  $\mu\text{M}$ , dipyridamole 10  $\mu\text{M}$ . Effect of inhibitors on the uptake of  $m^1A$  for 15 min was statistically analyzed by ANOVA followed by Dunnet's test. Effect of dipyridamole was statistically significant (p 0.0002).
