# Supplementary material for: Identification of Appropriate Endogenous Biomarker for Risk Assessment of Multidrug and Toxin Extrusion Protein‐Mediated Drug‐Drug Interactions in Healthy Volunteers
Source: PubMed Central journal article supplement — Clin Pharmacol Ther. 2020 Oct 9;109(2):507–16. doi: 10.1002/cpt.2022 (PMC7891601; doi:10.1002/cpt.2022), 2020-10-09
Supplement: CPT-109-507-s004.pdf [file CPT-109-507-s004.pdf]

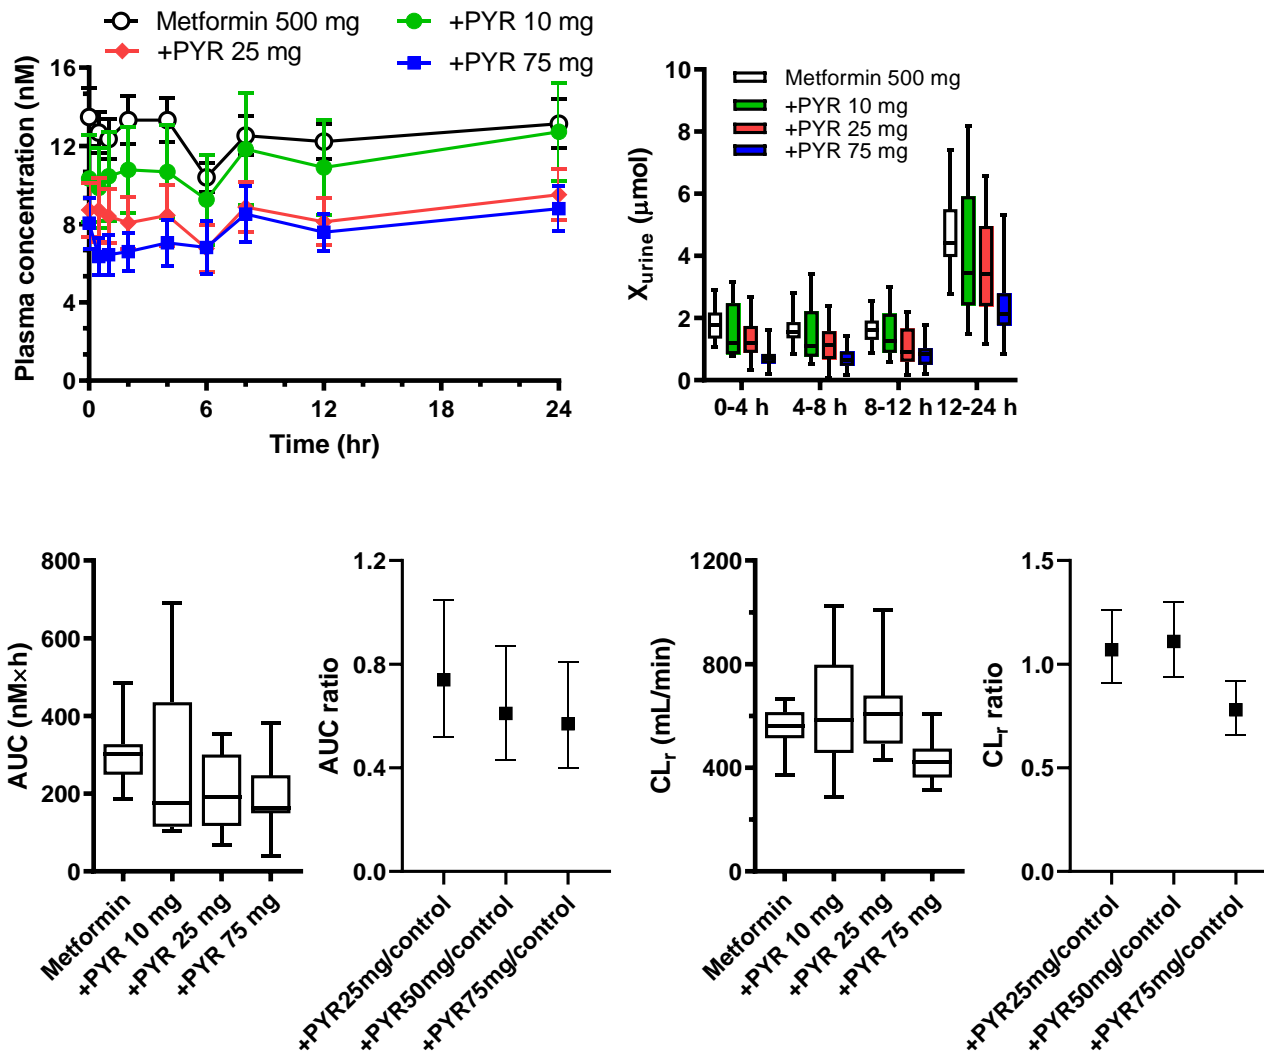

**Figure S4 Effect of pyrimethamine on the plasma concentration-time profiles and urinary excretion of pyridoxic acid (PDA)**

Plasma concentrations and amount excreted into the urine of pyridoxic acid (PDA) were determined.  $AUC_p$  and  $CL_r$  were calculated as described in the Methods, and shown in Box-and-Whisker plot. Geometric mean and 90% confidence of intervals of AUC ratio and  $CL_r$  ratio were cited from Table 1.
