# Supplementary material for: Identification of Appropriate Endogenous Biomarker for Risk Assessment of Multidrug and Toxin Extrusion Protein‐Mediated Drug‐Drug Interactions in Healthy Volunteers
Source: PubMed Central journal article supplement — Clin Pharmacol Ther. 2020 Oct 9;109(2):507–16. doi: 10.1002/cpt.2022 (PMC7891601; doi:10.1002/cpt.2022), 2020-10-09
Supplement: CPT-109-507-s005.pdf [file CPT-109-507-s005.pdf]

## hOCT2 rs316019

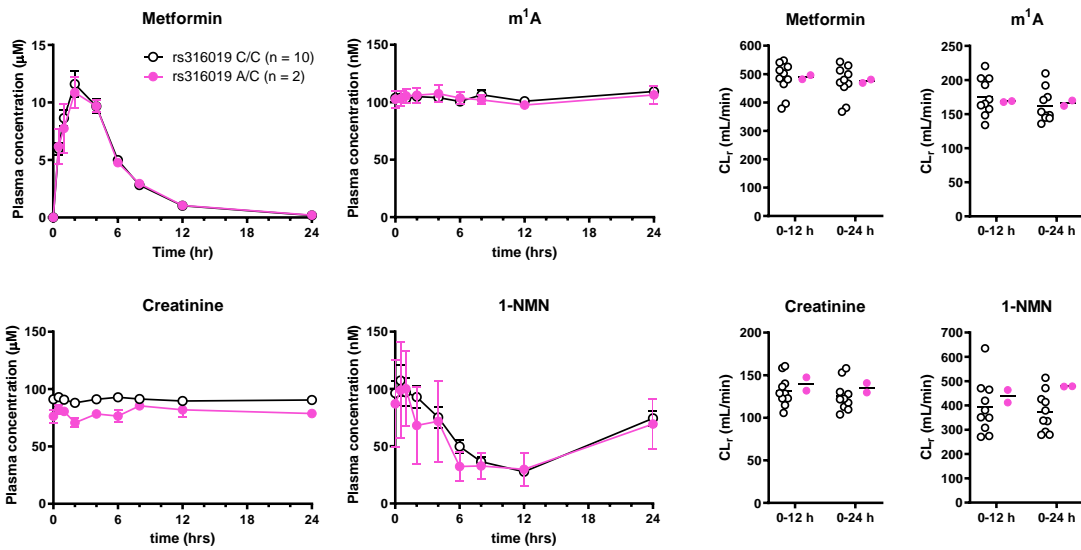

## hMATE1 rs2289669

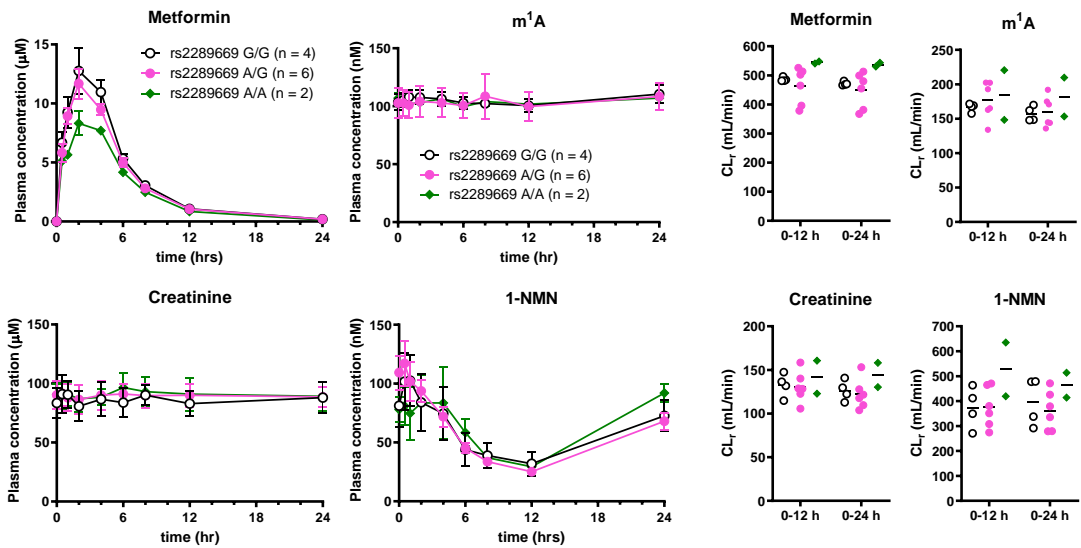

## hMATE1 rs2453579

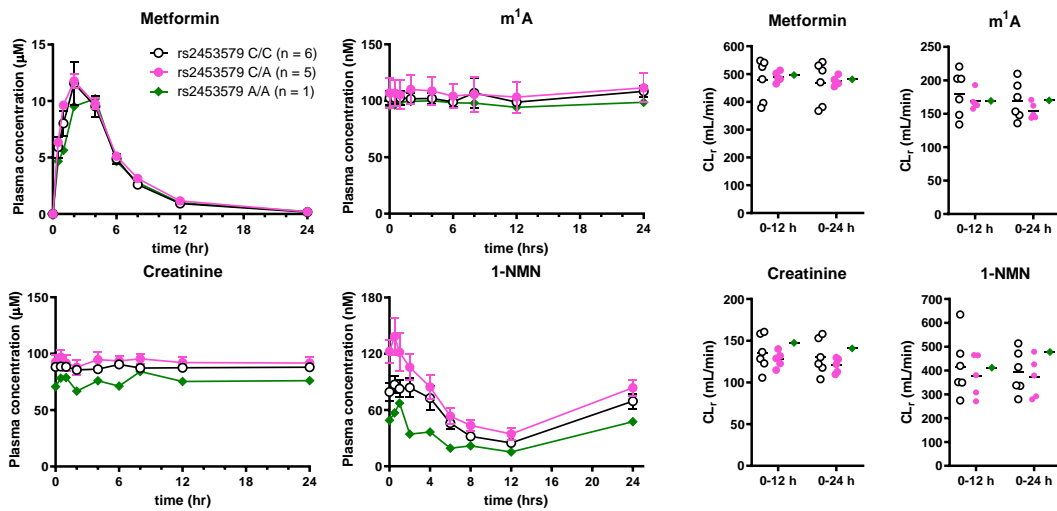

## hMATE1 rs2252281

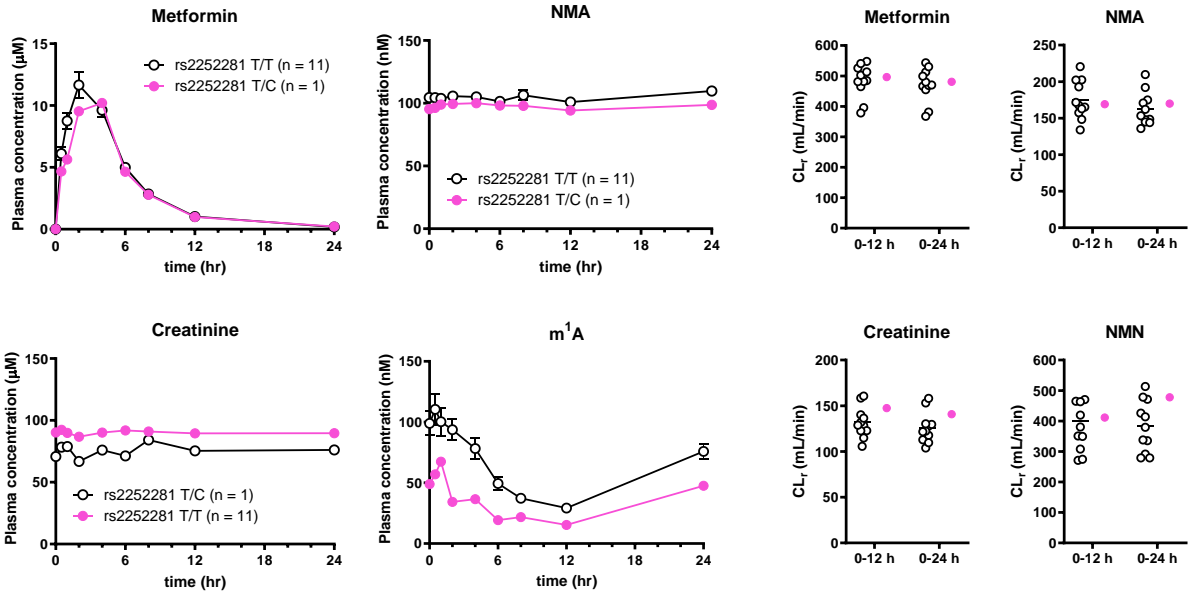

## hMATE2-K rs12943590

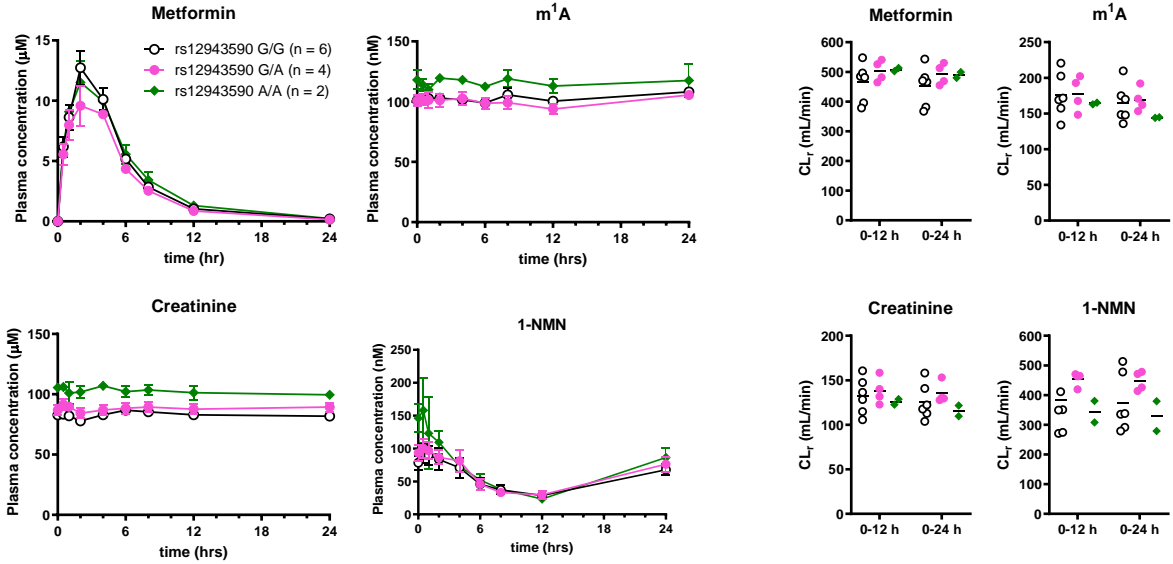

Figure S5 Effect of OCT2, MATE1 and MATE2-K genotypes on the plasma concentrations and  $CL_r$  of metformin, NMA, creatinine and NMN.
