# Supplementary material for: Identification of Appropriate Endogenous Biomarker for Risk Assessment of Multidrug and Toxin Extrusion Protein‐Mediated Drug‐Drug Interactions in Healthy Volunteers
Source: PubMed Central journal article supplement — Clin Pharmacol Ther. 2020 Oct 9;109(2):507–16. doi: 10.1002/cpt.2022 (PMC7891601; doi:10.1002/cpt.2022), 2020-10-09
Supplement: CPT-109-507-s006.pdf [file CPT-109-507-s006.pdf]

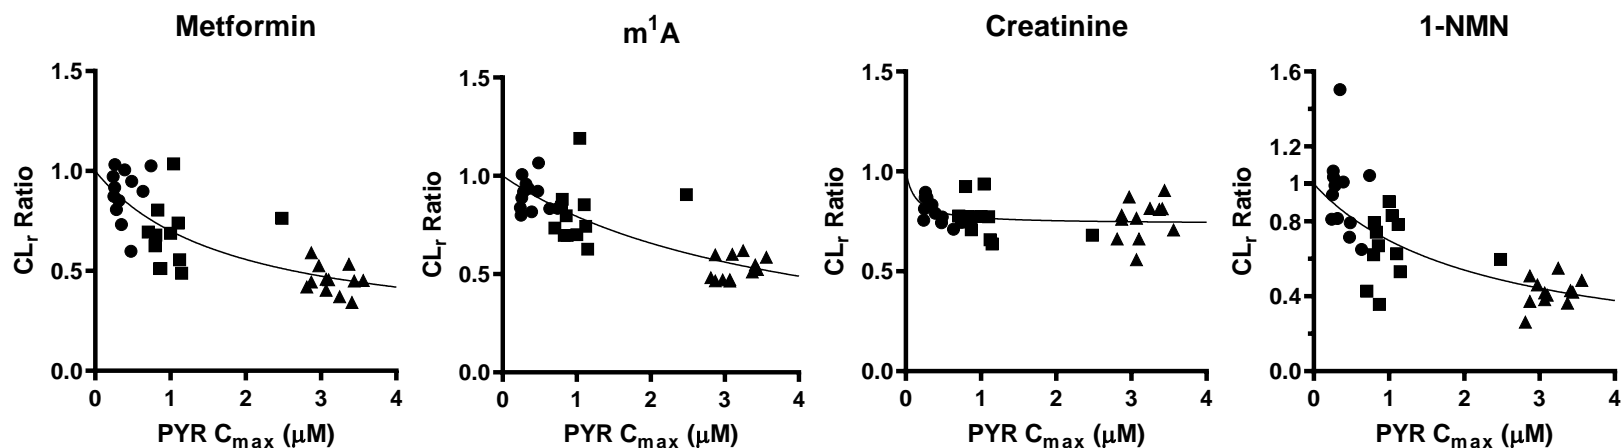

| Compound                           | $K_{i, app}$ (μM) | $f_{PYR}$         |
|------------------------------------|-------------------|-------------------|
| Metformin                          | $1.82 \pm 0.81$   | $0.845 \pm 0.158$ |
| N <sup>1</sup> -methyladenosine    | $3.84 \pm 2.64$   | 1                 |
| Creatinine                         | $0.130 \pm 0.087$ | $0.263 \pm 0.025$ |
| N <sup>1</sup> -methylnicotinamide | $2.19 \pm 1.17$   | $0.964 \pm 0.232$ |

**Figure S6  $K_{i,app}$  and  $f_{PYR}$  estimation using  $C_{max}$  of pyrimethamine.**

$K_{i,app}$  of pyrimethamine with regard to the maximum plasma concentrations, and  $f_{PYR}$  were determined by iterative non-linear regression analysis as described in Methods.
