# Supplementary material for: Identification of Appropriate Endogenous Biomarker for Risk Assessment of Multidrug and Toxin Extrusion Protein‐Mediated Drug‐Drug Interactions in Healthy Volunteers
Source: PubMed Central journal article supplement — Clin Pharmacol Ther. 2020 Oct 9;109(2):507–16. doi: 10.1002/cpt.2022 (PMC7891601; doi:10.1002/cpt.2022), 2020-10-09
Supplement: CPT-109-507-s007.pdf [file CPT-109-507-s007.pdf]

**Table S1 Pharmacokinetic parameters of metformin**

|          | C <sub>max</sub><br>( $\mu$ M) | T <sub>max</sub><br>(h) | AUC <sub>inf</sub> <sup>a</sup><br>( $\mu$ M $\times$ h) | f <sub>e</sub> <sup>b</sup> | T <sub>1/2</sub><br>(h) | CL/F <sup>c</sup><br>(ml/min) | CL <sub>r,p</sub> <sup>d</sup><br>(ml/min) | F <sup>e</sup>    | V <sub>d</sub> /F <sup>f</sup><br>(L) |
|----------|--------------------------------|-------------------------|----------------------------------------------------------|-----------------------------|-------------------------|-------------------------------|--------------------------------------------|-------------------|---------------------------------------|
| Control  | 12.0 $\pm$ 2.8                 | 2.67 $\pm$ 0.99         | 75.0 $\pm$ 13.6                                          | 0.683 $\pm$ 0.110           | 4.83 $\pm$ 0.56         | 692 $\pm$ 130                 | 471 $\pm$ 52.7                             | 0.542 $\pm$ 0.086 | 266 $\pm$ 55                          |
| +PYR10mg | 11.5 $\pm$ 2.6                 | 2.00 $\pm$ 0.74         | 78.7 $\pm$ 12.0                                          | 0.619 $\pm$ 0.125           | 6.98 $\pm$ 1.45         | 654 $\pm$ 102                 | 416 $\pm$ 61.7                             | 0.505 $\pm$ 0.097 | 269 $\pm$ 46                          |
| +PYR25mg | 15.3 $\pm$ 6.9                 | 2.83 $\pm$ 1.03         | 97.2 $\pm$ 26.7                                          | 0.566 $\pm$ 0.232           | 6.92 $\pm$ 1.56         | 552 $\pm$ 143                 | 317 $\pm$ 74.7                             | 0.461 $\pm$ 0.094 | 233 $\pm$ 68                          |
| +PYR75mg | 18.5 $\pm$ 7.7                 | 3.00 $\pm$ 1.04         | 132 $\pm$ 35                                             | 0.530 $\pm$ 0.146           | 6.23 $\pm$ 0.92         | 406 $\pm$ 113                 | 213 $\pm$ 31.7                             | 0.430 $\pm$ 0.113 | 180 $\pm$ 61                          |

<sup>a</sup>. AUC<sub>inf</sub> was calculated as  $AUC_{0-24h} + C_{24h}/(\ln 2/T_{1/2})$

<sup>b</sup>. f<sub>e</sub> was calculated as  $X_{urine}(0-24h)/Dose$

<sup>c</sup>. CL/F was calculated as  $Dose/AUC_{inf}$

<sup>d</sup>. CL<sub>r,p</sub> was calculated as  $X_{urine}(0-24h)/AUC_{0-24h}$

<sup>e</sup>. F was calculated as  $CL_r/(CL/F)$

<sup>f</sup>. V<sub>d</sub>/F was calculated as  $CL/F \times MRT$

Each parameter was shown as arithmetic mean  $\pm$  SEM. Statistical significance in the difference in the pharmacokinetic parameters between control and pyrimethamine-treated conditions was shown in Supplemental TableS2.

Parameters: C<sub>max</sub>, maximum plasma concentration; T<sub>max</sub>, time to achieve the maximum concentration; AUC<sub>inf</sub>, AUC from time 0 to infinity; f<sub>e</sub>, fraction recovered in the urine; T<sub>1/2</sub>, half-life at the terminal phase; CL/F, oral clearance; CL<sub>r</sub>, renal clearance; F, bioavailability; V<sub>d</sub>/F, apparent volume of distribution; MRT, mean residence time
